# Supplementary material for: Whip Rule Breaches in a Major Australian Racing Jurisdiction: Welfare and Regulatory Implications
Source: MDPI journal article supplement (doi:10.3390/ani7010004), 2017-01-16
Supplement: s1 [file s1]

# Supplementary Materials: Whip Rule Breaches in a Major Australian Racing Jurisdiction: Welfare and Regulatory Implications

Jennifer Hood, Carolyn McDonald, Bethany Wilson, Phil McManus and Paul McGreevy

**Table S1.** Details of tracks, race meetings, races, races with breaches, starts, and starts with breaches for Country, Metropolitan, and Provincial locations.

| Race Variables                            | Country<br><i>n</i> (%) | Metropolitan<br><i>n</i> (%) | Provincial<br><i>n</i> (%) | Total  |
|-------------------------------------------|-------------------------|------------------------------|----------------------------|--------|
| Tracks                                    | 112 (91.80%)            | 5 (4.10%)                    | 5 (4.10%)                  | 122    |
| Race meetings                             | 540 (68.79%)            | 111 (14.14%)                 | 134 (17.07%)               | 785    |
| Races                                     | 3731 (66.58%)           | 839 (14.97%)                 | 1034 (18.45%)              | 5604   |
| Races with breaches                       | 194 (58.43%)            | 73 (21.99%)                  | 65 (19.58%)                | 332    |
| Races with 2 horses with breaches         | 6                       | 4                            | 4                          | 14     |
| Races with 3 horses with breaches         | 0                       | 0                            | 1                          | 15     |
| Races with second breaches on same horse  | 16 (43.24%)             | 5 (13.51%)                   | 16 (43.24%)                | 37     |
| Starts                                    | 38,020 (67.34%)         | 8204 (14.53%)                | 10,232 (18.12%)            | 56,456 |
| Starts with breaches                      | 200 (57.47%)            | 77 (22.13%)                  | 71 (20.40%)                | 348    |
| Starts with second breaches on same horse | 16 (43.24%)             | 5 (13.51%)                   | 16 (43.24%)                | 37     |

**Table S2.** Whip rules breached in second breaches classified by Country, Metropolitan, and Provincial location.

| Breach Code      | Country Track<br>Number out of 200 (%) |          | Metropolitan Track<br>Number out of 77 (%) |          | Provincial Track<br>Number out of 71 (%) |          |
|------------------|----------------------------------------|----------|--------------------------------------------|----------|------------------------------------------|----------|
| No second breach | 184                                    | (92.00%) | 72                                         | (93.51%) | 55                                       | (77.46%) |
| 8                | 2                                      | (1.00%)  | 1                                          | (1.30%)  | 2                                        | (2.82%)  |
| 16               | 13                                     | (6.50%)  | 1                                          | (1.30%)  | 7                                        | (9.86%)  |
| 17               | 1                                      | (0.50%)  | 3                                          | (3.90%)  | 7                                        | (9.86%)  |

Code 8—Whip use that raises arm above jockey's shoulder height; Code 16—Forehand whip use \* in consecutive strides prior to 100 m mark; Code 17—Forehand whip use \* on more than 5 occasions prior to 100 m mark; \* Whip rules were amended 1 December 2015 to include backhand whip strikes as well as existing forehand restrictions.

**Table S3.** Fines resulting from first breaches.

| Fine \$ | Number of Fines | Total \$ |
|---------|-----------------|----------|
| 100     | 12              | 1200     |
| 200     | 61              | 12,200   |
| 300     | 16              | 4800     |
| 400     | 8               | 3200     |
| 500     | 4               | 2000     |
| 600     | 1               | 600      |
| 800     | 2               | 1600     |
| Total   | 104             | 25,600   |

**Table S4.** Outcomes of second breaches classified by whip rule breached.

| Second Breach Code | C ( <i>n</i> ) | R ( <i>n</i> ) | \$200 ( <i>n</i> ) | S ( <i>n</i> ) | CR ( <i>n</i> ) |
|--------------------|----------------|----------------|--------------------|----------------|-----------------|
| 8                  | 2              | 3              | 0                  | 0              | 0               |
| 16                 | 0              | 16             | 0                  | 1              | 4               |
| 17                 | 0              | 6              | 1                  | 3              | 1               |

C—Caution; R—Reprimand; \$200—Fine; S—Suspension; CR—Conviction Recorded; Code 8—Whip use that raises arm above jockey's shoulder height; Code 16—Forehand whip use \* in consecutive strides prior to 100 m mark; Code 17—Forehand whip use \* on more than 5 occasions prior to 100 m mark; \* Whip rules were amended 1 December 2015 to include backhand whip strikes as well as existing forehand restrictions.

**Table S5.** Total prize money on offer in races with breaches by location.

| Location     | KW chi-sq | Df | p Value |
|--------------|-----------|----|---------|
| Country      | 3.1522    | 4  | 0.5327  |
| Provincial   | 6.3111    | 4  | 0.1771  |
| Metropolitan | 10.3853   | 4  | 0.0344  |

**Table S6.** Length of races with breaches.

| Distance | Number | Distance | Number | Distance | Number |
|----------|--------|----------|--------|----------|--------|
| 900      | 6      | 1250     | 4      | 1580     | 1      |
| 950      | 1      | 1260     | 1      | 1600     | 50     |
| 1000     | 25     | 1280     | 4      | 1603     | 2      |
| 1006     | 1      | 1300     | 21     | 1624     | 1      |
| 1010     | 1      | 1303     | 1      | 1700     | 1      |
| 1012     | 1      | 1320     | 1      | 1750     | 1      |
| 1080     | 1      | 1350     | 5      | 1800     | 8      |
| 1100     | 23     | 1370     | 1      | 1812     | 3      |
| 1106     | 3      | 1400     | 45     | 1850     | 1      |
| 1120     | 1      | 1406     | 2      | 1900     | 11     |
| 1150     | 2      | 1420     | 1      | 2000     | 17     |
| 1175     | 1      | 1425     | 3      | 2012     | 2      |
| 1180     | 2      | 1450     | 3      | 2030     | 1      |
| 1200     | 45     | 1460     | 1      | 2100     | 8      |
| 1206     | 2      | 1500     | 13     | 2200     | 4      |
| 1207     | 1      | 1506     | 1      | 2300     | 1      |
| 1215     | 1      | 1530     | 2      | 2400     | 7      |
| 1240     | 1      | 1550     | 2      |          |        |

This corresponds to

| Min | 1st Quartile | Median | 3rd Quartile | Max  |
|-----|--------------|--------|--------------|------|
| 900 | 1200         | 1400   | 1600         | 2400 |

**Table S7.** Riders with breaches (including repeat offenders).

| Race Variables               | n   | %     |
|------------------------------|-----|-------|
| Sum of starts with breaches  | 348 |       |
| Number of riders             | 139 |       |
| Number of singles            | 68  | 48.92 |
| Number of repeats            | 71  | 51.08 |
| Number of males              | 108 | 77.70 |
| Number of repeat males       | 62  | 87.32 |
| Number of females            | 31  | 22.30 |
| Number of repeat females     | 9   | 12.68 |
| Number of jockeys            | 91  | 65.47 |
| Number of repeat jockeys     | 49  | 69.01 |
| Number of apprentices        | 48  | 34.53 |
| Number of repeat apprentices | 22  | 30.99 |

**Table S8.** Riders with the highest numbers of breaches.

| Rider Code | Jockey/Apprentice | Gender | Number of Starts with One or More Breaches | Number of Starts with Second Breaches |
|------------|-------------------|--------|--------------------------------------------|---------------------------------------|
| A          | Jockey            | Male   | 13                                         | 2                                     |
| B          | Jockey            | Male   | 12                                         | 0                                     |
| C          | Jockey            | Male   | 12                                         | 2                                     |
| D          | Apprentice        | Male   | 10                                         | 2                                     |
| E          | Jockey            | Male   | 9                                          | 1                                     |
| F          | Jockey            | Male   | 9                                          | 1                                     |
| G          | Jockey            | Male   | 8                                          | 3                                     |
| H          | Jockey            | Male   | 8                                          | 1                                     |
| I          | Jockey            | Male   | 7                                          | 1                                     |
| J          | Jockey            | Male   | 6                                          | 1                                     |
| K          | Jockey            | Male   | 6                                          | 1                                     |
| L          | Jockey            | Male   | 6                                          | 0                                     |
| M          | Jockey            | Female | 6                                          | 0                                     |
| N          | Jockey            | Male   | 6                                          | 0                                     |
| O          | Jockey            | Male   | 6                                          | 1                                     |

Rider code—each letter represents the name of a different rider.

**Table S9.** Riders breaching whip rules in two races at the same race meeting.

| Date 2013    | Race Track     | Location | Rider Code | Jockey/Apprentice | Gender |
|--------------|----------------|----------|------------|-------------------|--------|
| 9 January    | Warwick Farm   | M        | B          | Jockey            | Male   |
| 6 April      | Rosehill       | M        | G          | Jockey            | Male   |
| 13 April     | Port Macquarie | C        | H          | Jockey            | Male   |
| 19 April     | Ballina        | C        | P          | Apprentice        | Male   |
| 16 July      | Wagga Wagga    | C        | Q          | Apprentice        | Male   |
| 21 July      | Hawkesbury     | P        | A          | Jockey            | Male   |
| 31 July      | Warwick Farm   | M        | F          | Jockey            | Male   |
| 26 August    | Bathurst       | C        | I          | Jockey            | Male   |
| 31 August    | Hawkesbury     | P        | R          | Apprentice        | Female |
| 19 September | Newcastle      | P        | A          | Jockey            | Male   |
| 12 October   | Kembla Grange  | P        | S          | Jockey            | Male   |
| 5 November   | Orange         | C        | O          | Jockey            | Male   |
| 6 December   | Coffs Harbour  | C        | T          | Apprentice        | Female |

M—Metropolitan, C—Country, P—Provincial; Rider code—each letter represents the name of a different rider with A–O the same as designated in Supplementary Materials Table S8.

### S3.9.2. Frequency of Whip Rule Breaches in BOBS Races

Excluding the nine starts with breaches in the ACT, there were 339 starts with at least one breach recorded; 68 (20.06%) of these were BOBS horses in BOBS races; 248 (73.16%) were Non-BOBS horses in BOBS races; and 23 (6.78%) were horses in Non-BOBS races. That is, 93.22% of starts resulting in breaches occurred in BOBS races, compared with the 96.07% of races that were BOBS races.

At C locations, 187 (97.91%) of the 191 starts resulting in a breach or breaches were in BOBS races, which comprised over 99% of races. At M tracks, 62 (80.52%) of 77 starts resulting in a breach or breaches occurred in BOBS races, which comprised 82% of races. At P tracks, 67 (94.37%) of 71 starts resulting in a breach or breaches occurred in BOBS races, which comprised 97.39% of races. These data do not suggest BOBS races are more likely to result in breaches. Further details are provided in Supplementary Materials Table S10.

While 99% of C races were BOBS races, only 17.96% of horses starting in C races were BOBS horses. P races had the highest proportion of BOBS horses starting (34.48%), with 97.38% of races at P tracks being BOBS races. M races were the least likely to be BOBS races, at 82%, and yet 27.85% of M starts were by BOBS horses. This suggests the average number of BOBS horses in a BOBS race varies by location. For further details see Supplementary Materials Table S11.

**Table S10.** BOBS and Non-BOBS races classified by Country, Metropolitan, or Provincial location.

| Location     | Non-BOBS Races<br>(% out of 212) |          | BOBS Races<br>(% out of 5187) |          | Total<br>(% out of 5399 NSW Races) |          |
|--------------|----------------------------------|----------|-------------------------------|----------|------------------------------------|----------|
| Country      | 34                               | (16.04%) | 3492                          | (67.32%) | 3526                               | (65.31%) |
| Metropolitan | 151                              | (71.23%) | 688                           | (13.26%) | 839                                | (15.54%) |
| Provincial   | 27                               | (12.74%) | 1007                          | (19.41%) | 1034                               | (19.15%) |

BOBS—Racing NSW Breeder Owner Bonus Scheme.

**Table S11.** Percentage of BOBS horses in starts classified by Country, Metropolitan or Provincial location.

| Horses          | Country Starts | Metropolitan Starts | Provincial Starts |
|-----------------|----------------|---------------------|-------------------|
| BOBS horses (n) | 6455           | 2285                | 3528              |
| (%)             | (17.96%)       | (27.85%)            | (34.48%)          |
| All HORSES      | 35,944         | 8204                | 10,232            |

BOBS—Racing NSW Breeder Owner Bonus Scheme.

**Table S12.** BOBS status of 339 horses with breaches classified by Country, Metropolitan or Provincial location.

| Races          | Horses         | Country (% out of 191 Starts with Breaches) |         | Metropolitan (% out of 71 Starts with Breaches) |         | Provincial (% out of 77 Starts with Breaches) |         | Total (% out of 339 Starts with Breaches) |         |
|----------------|----------------|---------------------------------------------|---------|-------------------------------------------------|---------|-----------------------------------------------|---------|-------------------------------------------|---------|
| BOBS races     | BOBS horse     | 26                                          | −13.61% | 20                                              | −25.97% | 22                                            | −30.99% | 68                                        | −20.06% |
|                | Non-BOBS horse | 161                                         | −84.29% | 42                                              | −54.55% | 45                                            | −63.38% | 248                                       | −73.16% |
| Non-BOBS races |                | 4                                           | −2.09%  | 15                                              | −19.48% | 4                                             | −5.63%  | 23                                        | −6.78%  |

BOBS—Racing NSW Breeder Owner Bonus Scheme.

#### S3.9.4. Whip Rule First Breaches in BOBS and Non-BOBS Races

- (i) Code 16 First Breaches (Forehand Whip Use in Consecutive Strides prior to 100 m Mark) in BOBS and Non-BOBS Races

A  $\chi^2$  value of 14.6925 with an associated  $p$  value  $< 0.01$  suggests a breach of Code 16 occurs more frequently among first breaches in Non-BOBS races than in BOBS races.

- (ii) Code 17 First Breaches (Forehand Whip Use on More Than Five Occasions prior to 100 m Mark) in BOBS and Non-BOBS Races

A  $\chi^2$  value of 2.648 with an associated  $p$  value  $= 0.1037$  suggests a breach of Code 17 occurs no more frequently among first breaches in Non-BOBS races than in BOBS races.

**Table S13.** Whip rules breached in first breaches in BOBS and Non-BOBS races.

| Breach Code | BOBS Race                     |         |                                |         | Non-BOBS Race                 |         |
|-------------|-------------------------------|---------|--------------------------------|---------|-------------------------------|---------|
|             | BOBS Horses                   |         | Non-BOBS Horses                |         | Number (%) out of 23 Breaches |         |
|             | Number (%) out of 68 Breaches |         | Number (%) out of 248 Breaches |         |                               |         |
| 6           | 3                             | −4.41%  | 7                              | −2.82%  | 0                             | 0.00%   |
| 7           | 2                             | −2.94%  | 4                              | −1.61%  | 0                             | 0.00%   |
| 8           | 20                            | −29.41% | 57                             | −22.98% | 9                             | −39.13% |
| 9           | 9                             | −13.24% | 33                             | −13.31% | 0                             | 0.00%   |
| 13          | 0                             | 0.00%   | 1                              | −0.40%  | 0                             | 0.00%   |
| 14          | 0                             | 0.00%   | 1                              | −0.40%  | 0                             | 0.00%   |
| 16          | 3                             | −4.41%  | 22                             | −8.87%  | 8                             | −34.78% |
| 17          | 31                            | −45.59% | 114                            | −45.97% | 6                             | −26.09% |
| 24          | 0                             | 0.00%   | 9                              | −3.63%  | 0                             | 0.00%   |

BOBS—Racing NSW Breeder Owner Bonus Scheme; Code 6—Excessive/unnecessary/improper whip use; Code 7—Whip use forward of horse's shoulder/vicinity of head; Code 8—Whip use that raises arm above jockey's shoulder height; Code 9—Whip use when horse is out of contention; Code 13—Whip use when horse is clearly winning; Code 14—Whip use when horse has no reasonable prospect of improving/losing position; Code 16—Forehand whip use \* in consecutive strides prior to 100 m mark; Code 17—Forehand whip use \* on more than 5 occasions prior to 100 m mark; Code 24—Whip Rule breach not specified by Stewards; \* Whip rules were amended 1 December 2015 to include backhand whip strikes as well as existing forehand restrictions.

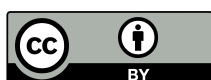

© 2017 by the authors; licensee MDPI, Basel, Switzerland. This article is an open access article distributed under the terms and conditions of the Creative Commons by Attribution (CC-BY) license (<http://creativecommons.org/licenses/by/4.0/>).
